# Supplementary material
Source: Springer Nature journal article supplement (https://www.springermedizin.de/resource/supplementary/13075_2010_2942_MOESM2_ESM.pdf/9693240)

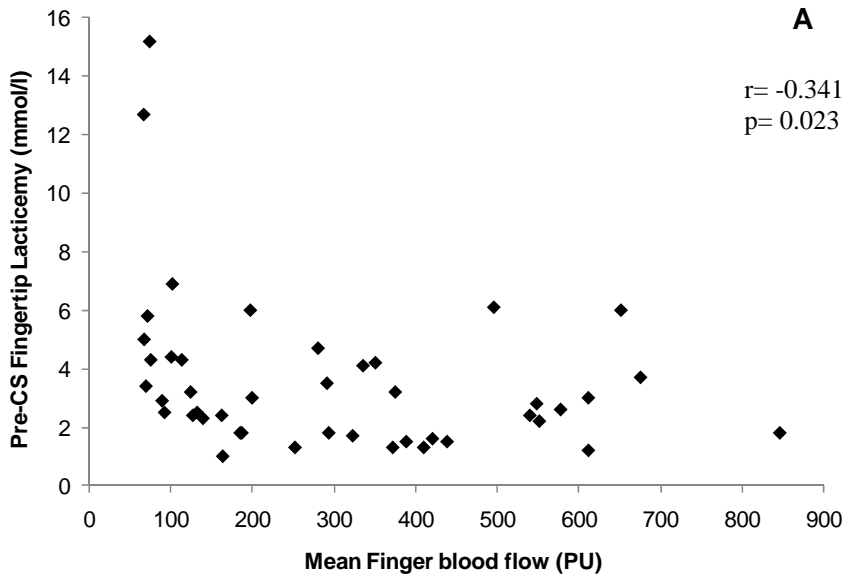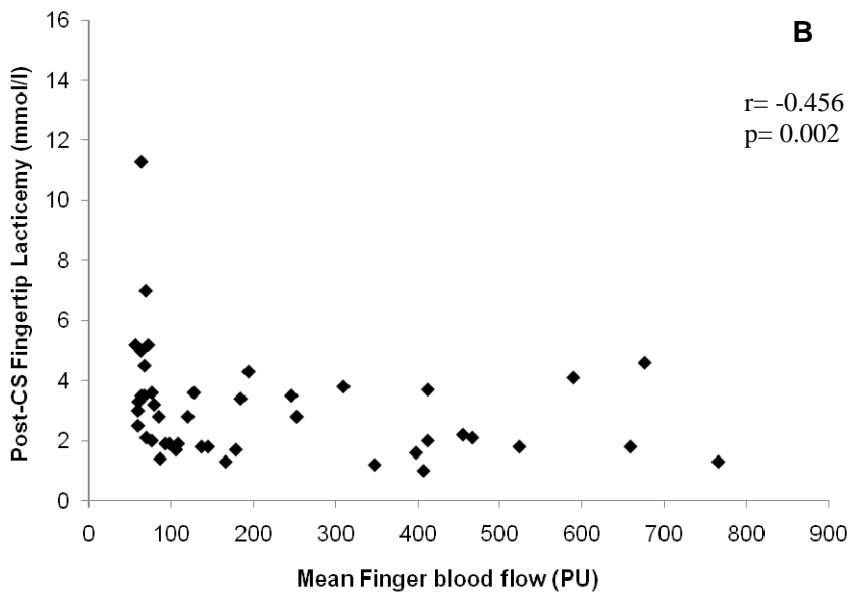

Supplement: MOESM2 [file 9693240]
